# Supplementary material
Source: publisher figshare collection journal article supplement (https://tandf.figshare.com/ndownloader/files/13595051)
Supplement: Supplementary file 1 [file 13595051]

**Supporting Information**

**The thermodynamics of guest complexation to octa-acid and tetra-*endo*-methyl octa-acid: reference data for the sixth statistical assessment of modeling of proteins and ligands (SAMPL6)**

Matthew R. Sullivan, Wei Yao, and Bruce C. Gibb*
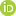


Department of Chemistry

Tulane University

New Orleans

LA 70118, USA

**Table of contents**

The Hosts and Guests S3

Summary of Thermodynamic Data S4

Materials and Instrumentation S5

ITC Experimental Parameters S6

ITC Results S8

References S24

**The Hosts and Guests**

The hosts (**OA** and **TEMOA**) and guests (**G0**-**G7**) used in this study are shown below.


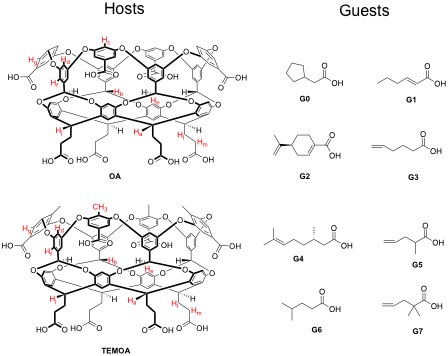


**Figure S1.** Chemical structures of hosts **OA** and **TEMOA** and guests **G0**-**G7**.

**Summary of Thermodynamic Data**

Table **S1** shows the thermodynamic data for the binding of the conjugate bases of guests **G0-G7** with hosts **OA** and **TEMOA**.

| **Guests** | **OA (1)** | | | | **TEMOA (2)** | | | |
| --- | --- | --- | --- | --- | --- | --- | --- | --- |
| *Ka*  M-1 | *G*˚b | *H*˚ | -T*S* kcal/mol/K | *Ka*  M-1 | *G*˚b | *H*˚ | -T*S* kcal/mol/K |
| kcal/mol | kcal/mol | kcal/mol | kcal/mol |
| **G0** | 1.47 E04 (2%) | -5.68 | -4.84 (<1%) | -0.84 (4%) | 2.81 E04 (<1%) | -6.06 | -7.85 (2%) | 1.77 (8%) |
|
| **G1** | 2.57 E03 (1%) | -4.65 | -5.52 (1%) | 0.86 (10 %) | 2.4 E04 (4%) | -5.97 | -8.25 (4%) | 2.27 (14%) |
|
| **G2** | 1.40 E06 (1 %) | -8.38 | -12.07 (<1%) | 3.69 (<1%) | 9.82 E04 (<1%) | -6.81 | -9.27 (<1%) | 2.46 (<1%) |
|
| **G3** | 6.21 E03 (<1%) | -5.18 | -7.53 (<1%) | 2.35 (1 %) | 1.28 E04 (4%) | -5.60 | -8.86 (2%) | 3.25 (4%) |
|
| **G4** | 1.64 E05 (1%) | -7.11 | -6.92 (<1%) | -0.19 (13%) | 5.12 E05 (<1%) | -7.79 | -8.87 (<1%) | 1.08 (<1%) |
|
| **G5** | 2.33 E03 (1%) | -4.59 | -5.31 (<1%) | 0.71 (2%) | 1.13 E03 (<1%) | -4.16 | -7.96 (1%) | 3.80 (3%) |
|
| **G6** | 4.37 E03 (<1%) | -4.97 | -5.29 (<1%) | 0.33 (11%) | 9.12 E03 (2%) | -5.40 | -6.19 (<1%) | 0.79 (7%) |
|
| **G7** | 3.60 E04 (<1%) | -6.22 | -7.44 (<1%) | 1.23 (2%) | 1.07 E03 (<1%) | -4.13 | -8.33 (<1%) | 4.20 (<1%) |
|

**Table S1:** Thermodynamic data from ITC for the binding of guests **G0**-**G7** to hosts **OA** and **TEMOA**.a

1. 25 ˚C, 50 mM sodium phosphate buffer, pH = 11.5.
2. Calculated error in ∆G is negligible due to the logarithmic relationship with *Ka*.

**Materials and Instrumentation**

All guests (purity ≥ 95%) were purchased from Aldrich Chemical Company and were used without purification. Hosts **OA** and **TEMOA** were synthesized following previously reported procedures.[1](#_ENREF_1),[2](#_ENREF_3)

Isothermal Titration Calorimetric (ITC) experiments within this study were performed at 298 K using a VP-ITC MicroCalorimeter from Microcal, USA. Integrated heat data obtained for the titrations were fitted using the MicroCal-Origin 7.0 software package. All titrations were carried out in 50 mM sodium phosphate buffer of pH ~ 11.5 at 25 ˚C. Before each experiment, both host and guest solutions were degassed for 2-5 min to eliminate air bubbles. The injection volumes for all titrations used the computer-controlled injection procedure of guest solution into host solution. The injection volumes used for each titration are detailed in the next section.

The binding for most host-guest pairs gave adequate heats of injection such that general ITC titration procedures could be followed. However, in the case of **OA-G0** and **G5**, as well as **TEMOA-G5** and **G7**, theWiseman “*c*” values (*c* = [host] × *Ka*) were less than ideal (i.e., < 5),[3](#_ENREF_4) and modification procedures defined by Turnbull[4](#_ENREF_5)and Tellinghuisen[5](#_ENREF_6) were followed. Thus, variable titrant volumes were used to deliver a large excess of guest with the stoichiometry parameter N fixed to 1. We have used the same modification procedures previously.[6](#_ENREF_7)Moreover, because the heats of complexation were relatively low, higher concentrations of the guest titrant were required which necessitated guest dilution reference titrations (guest injected into buffer solution sans host) to be carried out and subtracted from the host-guest titration.

All the ITC titrations exhibited clear thermal responses and gave an excellent fit for a 1:1 complex model. All titrations were run in triplicate, and good reproducibility of *Ka* and *∆H* values with the experimental error between runs less than 5%, and -T*∆S* values less than 15%; as shown in Table **S1**.

**ITC Experimental Parameters**

Each host-guest system required specific conditions to fit within the instrumental limitations inherent of ITC. Specifically, the concentrations for host and guest, injection procedure, and DP value (Differential (or reference) Power) used for each host-guest pair is listed below.

**Cyclopentyl acetic acid (G0):**

***OA:*** DP = 15. The ITC titration experiment used the computer-controlled 28-injection procedure of 10 mM guest solution into 0.5 mM host solution. The following variable injection volumes were used (μL); V1-5 = 3.0; V6-12 = 6.0; V13-28 = 9.0.

***TEMOA:*** DP = 25. The ITC titration experiment utilized a 31-injection procedure of a 10 mM guest solution titrated into a 1 mM host solution: (L); V1 = 2.0; V2 – V31 = 9.0.

***Trans*-2-hexenoic acid (G1):**

***OA:*** DP = 15.The ITC titration experiment used the computer-controlled 28-injection procedure of 20 mM guest solution into 0.5 mM host solution. The following variable injection volumes were used (μL); V1 = 3.0; V2-8 = 6.0; V9-28 = 9.0.

***TEMOA:*** DP = 25. The ITC titration experiment utilized a 31-injection procedure of a 10 mM guest solution titrated into a 1 mM host solution: (L); V1 = 2.0; V2 – V31 = 9.0.

***(s)-(-)-*perillic acid (G2):**

***OA:*** DP = 25.The ITC titration experiment used the computer-controlled 28-injection procedure of 5 mM guest solution into 0.5 mM host solution. The following variable injection volumes were used (μL); V1 = 3.0; V2-28 = 9.0.

***TEMOA:*** DP = 30. The ITC titration experiment utilized a 28-injection procedure of a 10 mM guest solution titrated into a 1 mM host solution: (L); V1 = 2.0; V2 – V28 = 9.0.

***5-hexenoic acid (G3):***

***OA:*** DP = 25.The ITC titration experiment used the computer-controlled 28-injection procedure of 20 mM guest solution into 0.5 mM host solution. The following variable injection volumes were used (μL); V1 = 4.0; V2-8 = 6.0; V9-28 = 9.0.

***TEMOA:*** DP = 25. The ITC titration experiment utilized a 31-injection procedure of a 10 mM guest solution titrated into a 1 mM host solution: (L); V1 = 2.0; V2 – V31 = 9.0.

***(s)-(-)-*citronellic acid (G4):**

***OA:*** DP = 15.The ITC titration experiment used the computer-controlled 28-injection procedure of 5 mM guest solution into 0.5 mM host solution. The following variable injection volumes were used (μL); V1-28 = 9.0.

***TEMOA:*** DP = 10. The ITC titration experiment utilized a 32-injection procedure of a 3.75 mM guest solution titrated into a 0.25 mM host solution: (L); V1 = 2.0; V2 – V32 = 6.0.

**2-methyl-4-pentenoic acid (G5):**

***OA:*** DP = 15.The ITC titration experiment used the computer-controlled 28-injection procedure of 20 mM guest solution into 0.5 mM host solution. The following variable injection volumes were used (μL); V1-28 = 9.0.

***TEMOA:*** DP = 20. The ITC titration experiment utilized a 32-injection procedure of a 30 mM guest solution titrated into a 0.5 mM host solution: (L); V1 = 2.0; V2 – V32 = 8.0.

**4-methylvaleric acid (G6):**

***OA:*** DP = 15.The ITC titration experiment used the computer-controlled 28-injection procedure of 20 mM guest solution into 0.5 mM host solution. The following variable injection volumes were used (μL); V1 = 3.0; V2-8 = 6.0; V9-28 = 9.0.

***TEMOA:*** DP = 20. The ITC titration experiment utilized a 32-injection procedure of a 12 mM guest solution titrated into a 1 mM host solution: (L); V1 = 2.0; V2 – V32 = 9.0.

**2,2-dimethyl-4-pentenoic acid (G7):**

***OA:*** DP = 20.The ITC titration experiment used the computer-controlled 28-injection procedure of 10 mM guest solution into 0.5 mM host solution. The following variable injection volumes were used (μL); V1-5 = 3.0; V6-12 = 6.0; V13-28 = 9.0.

***TEMOA:*** DP = 20. The ITC titration experiment utilized a 34-injection procedure of a 30 mM guest solution titrated into a 0.5 mM host solution: (L); V1 = 2.0; V2 – V34 = 6.0.

**ITC Results**

The figures below show an example thermogram and binding curve of one titration experiment for each host guest pair.

**Cyclopentyl acetic acid (G0)**

**Figure S2:** ITC thermogram and 1:1 binding fit for **OA-G0** complexation. A 10 mM solution of **G0** was titrated into 0.5 mM solution of **OA** equilibrated at 25 ˚C. Both host and guest were in 50 mM phosphate buffer, pH 11.5.

**Figure S3:** ITC thermogram and 1:1 binding fit for **TEMOA-G0** complexation. A 10 mM solution of **G0** was titrated into 1 mM solution of **TEMOA** equilibrated at 25 ˚C. Both host and guest were in 50 mM phosphate buffer, pH 11.5.

***Trans*-2-hexenoic acid (G1)**

**Figure S4:** ITC thermogram and 1:1 binding fit for **OA-G1** complexation. A 20 mM solution of **G1** was titrated into 0.5 mM solution of **OA** equilibrated at 25 ˚C. Both host and guest were in 50 mM phosphate buffer, pH 11.5.

**Figure S5:** ITC thermogram and 1:1 binding fit for **TEMOA-G1** complexation. A 10 mM solution of **G1** was titrated into 1 mM solution of **TEMOA** equilibrated at 25 ˚C. Both host and guest were in 50 mM phosphate buffer, pH 11.5.

***(s)-(-)-*perillic acid (G2)**

**Figure S6:** ITC thermogram and 1:1 binding fit for **OA-G2** complexation. A 5 mM solution of **G2** was titrated into 0.5 mM solution of **OA** equilibrated at 25 ˚C. Both host and guest were in 50 mM phosphate buffer, pH 11.5.

**Figure S7:** ITC thermogram and 1:1 binding fit for **TEMOA-G2** complexation. A 10 mM solution of **G2** was titrated into 1 mM solution of **TEMOA** equilibrated at 25 ˚C. Both host and guest were in 50 mM phosphate buffer, pH 11.5.

***5-hexenoic acid (G3)***

**Figure S8:** ITC thermogram and 1:1 binding fit for **OA-G3** complexation. A 20 mM solution of **G3** was titrated into 0.5 mM solution of **OA** equilibrated at 25 ˚C. Both host and guest were in 50 mM phosphate buffer, pH 11.5.

**Figure S9:** ITC thermogram and 1:1 binding fit for **TEMOA-G3** complexation. A 10 mM solution of **G3** was titrated into 1 mM solution of **TEMOA** equilibrated at 25 ˚C. Both host and guest were in 50 mM phosphate buffer, pH 11.5.

***(s)-(-)-*citronellic acid (G4)**

**Figure S10:** ITC thermogram and 1:1 binding fit for **OA-G4** complexation. A 5 mM solution of **G4** was titrated into 0.5 mM solution of **OA** equilibrated at 25 ˚C. Both host and guest were in 50 mM phosphate buffer, pH 11.5.

**Figure S11:** ITC thermogram and 1:1 binding fit for **TEMOA-G4** complexation. A 3.75 mM solution of **G4** was titrated into 0.25 mM solution of **TEMOA** equilibrated at 25 ˚C. Both host and guest were in 50 mM phosphate buffer, pH 11.5.

**2-methyl-4-pentenoic acid (G5)**

**Figure S12:** (a): ITC data for the complex formed between **OA** and **G5**. A 20 mM solution of **G5** was titrated into 0.5 mM solution of **OA** equilibrated at 25 ˚C. Both host and guest were in 50 mM phosphate buffer, pH 11.5. (b): ITC titration of **G5** into buffer alone. (c):An overlay of (a) and (b) ITC data. (d): The resultant final binding curve after subtracting (b) from (a).

**Figure S13:** (a): ITC data for the complex formed between **TEMOA** and **G5**. A 30 mM solution of **G5** was titrated into 0.5 mM solution of **TEMOA** equilibrated at 25 ˚C. Both host and guest were in 50 mM phosphate buffer, pH 11.5. (b): ITC titration of **G5** into buffer alone. (c):An overlay of (a) and (b) ITC data. (d): The resultant final binding curve after subtracting (b) from (a).

**4-methylvaleric acid (G6)**

**Figure S14:** ITC thermogram and 1:1 binding fit for **OA-G6** complexation. A 20 mM solution of **G6** was titrated into 0.5 mM solution of **OA** equilibrated at 25 ˚C. Both host and guest were in 50 mM phosphate buffer, pH 11.5.

**Figure S15:** ITC thermogram and 1:1 binding fit for **TEMOA-G6** complexation. A 10 mM solution of **G6** was titrated into 1 mM solution of **TEMOA** equilibrated at 25 ˚C. Both host and guest were in 50 mM phosphate buffer, pH 11.5.

**2,2-dimethyl-4-pentenoic acid (G7):**

**Figure S16:** ITC thermogram and 1:1 binding fit for **OA-G7** complexation. A 10 mM solution of **G7** was titrated into 0.5 mM solution of **OA** equilibrated at 25 ˚C. Both host and guest were in 50 mM phosphate buffer, pH 11.5.

**Figure S17:** (a): ITC data for the complex formed between **TEMOA** and **G7**. A 30 mM solution of **G7** was titrated into 0.5 mM solution of **TEMOA** equilibrated at 25 ˚C. Both host and guest were in 50 mM phosphate buffer, pH 11.5. (b): ITC titration of **G7** into buffer alone. (c):An overlay of (a) and (b) ITC data. (d): The resultant final binding curve after subtracting (b) from (a).

**References**

1. (a) Liu, S.; Whisenhunt-Ioup, S. E.; Gibb, C. L. D.; Gibb, B. C., An improved synthesis of 'octa-acid' deep-cavity cavitand. *Supramol. Chem.* **2011,** *23* (6), 480-485; (b) Gibb, C. L. D.; Gibb, B. C., Well-Defined, Organic Nanoenvironments in Water: The Hydrophobic Effect Drives a Capsular Assembly. *J. Am. Chem. Soc.* **2004,** *126* (37), 11408-11409.

2. Gan, H.; Benjamin, C. J.; Gibb, B. C., Nonmonotonic Assembly of a Deep-Cavity Cavitand. *J. Am. Chem. Soc.* **2011,** *133* (13), 4770-4773.

3. Sun, H.; Gibb, C. L. D.; Gibb, B. C., Calorimetric analysis of the 1:1 complexes formed between a water-soluble deep-cavity cavitand, and cyclic and acyclic carboxylic acids. *Supramol. Chem.* **2008,** *20* (1&2), 141-147.

4. Turnbull, W. B.; Daranas, A. H., On the Value of c: Can Low Affinity Systems Be Studied by Isothermal Titration Calorimetry? *J. Am. Chem. Soc.* **2003,** *125* (48), 14859-14866.

5. Tellinghuisen, J., Isothermal titration calorimetry at very low c. *Anal. Biochem.* **2008,** *373* (2), 395-397.

6. (a) Sokkalingam, P.; Shraberg, J.; Rick, S. W.; Gibb, B. C., Binding Hydrated Anions with Hydrophobic Pockets. *J. Am. Chem. Soc.* **2016,** *138* (1), 48-51; (b) Wang, K.; Sokkalingam, P.; Gibb, B. C., ITC and NMR analysis of the encapsulation of fatty acids within a water-soluble cavitand and its dimeric capsule. *Supramol. Chem.* **2015**, Ahead of Print; (c) Sullivan, M. R.; Sokkalingam, P.; Nguyen, T.; Donahue, J. P.; Gibb, B. C., Binding of carboxylate and trimethylammonium salts to octa-acid and TEMOA deep-cavity cavitands. *J. Comput.-Aided Mol. Des.* **2016**, Ahead of Print.
